# Supplementary material for: A three-dimensional coral-like Zn,O-codoped Ni3S2 electrocatalyst for efficient overall water splitting at a large current density
Source: Royal Society of Chemistry journal article supplement (doi:10.1039/d1se01708j), 2021-12-21
Supplement: d1se01708j1.pdf [file d1se01708j1.pdf]

## SUPPORTING INFORMATION

### **Three-dimensional coral-like Zn,O-codoped Ni<sub>3</sub>S<sub>2</sub> electrocatalyst for efficient overall water splitting at large current density**

Liyun Cao,<sup>a</sup> Yifei Zhang,<sup>a</sup> Liangliang Feng,<sup>\*a</sup> Danyang He,<sup>a</sup> Qianqian Liu,<sup>b</sup> Yingbo Gong,<sup>a</sup>

Guodong Li<sup>c</sup> and Jianfeng Huang<sup>\*a</sup>

<sup>a</sup> *School of Material Science and Engineering, International S&T Cooperation Foundation of Shaanxi Province, Xi'an Key Laboratory of Green Manufacture of Ceramic Materials, Key Laboratory of Auxiliary Chemistry and Technology for Chemical Industry, Ministry of Education, Shaanxi University of Science and Technology, Xi'an, 710021 P.R. China.*

<sup>b</sup> *College of Materials Science and Engineering, Xi'an University of Science and Technology, Xi'an 710054, China.*

<sup>c</sup> *State Key Laboratory of Inorganic Synthesis and Preparative Chemistry, College of Chemistry, Jilin University, Changchun 130012, China*

E-mail: fengll@sust.edu.cn huangjf@sust.edu.cn.

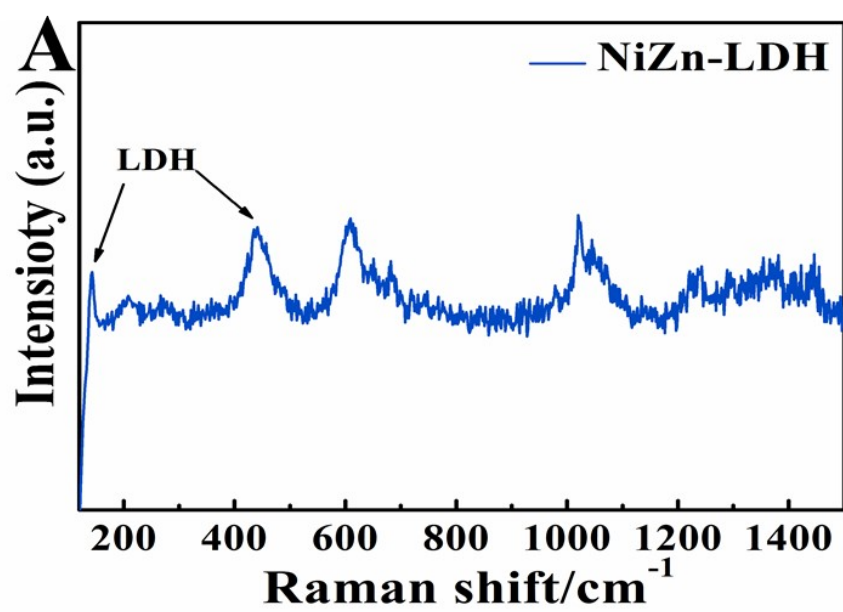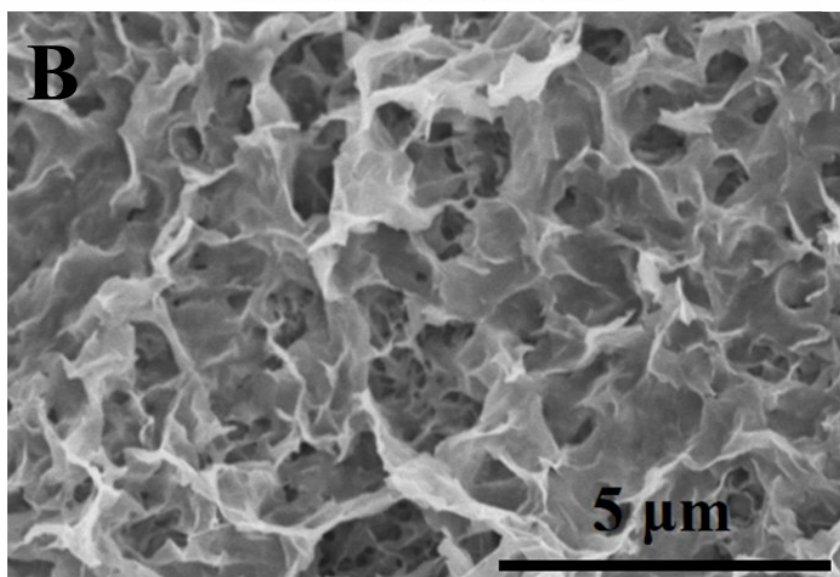

**Figure S.1** (A) Raman spectra; (B) SEM image of NiZn-LDH.

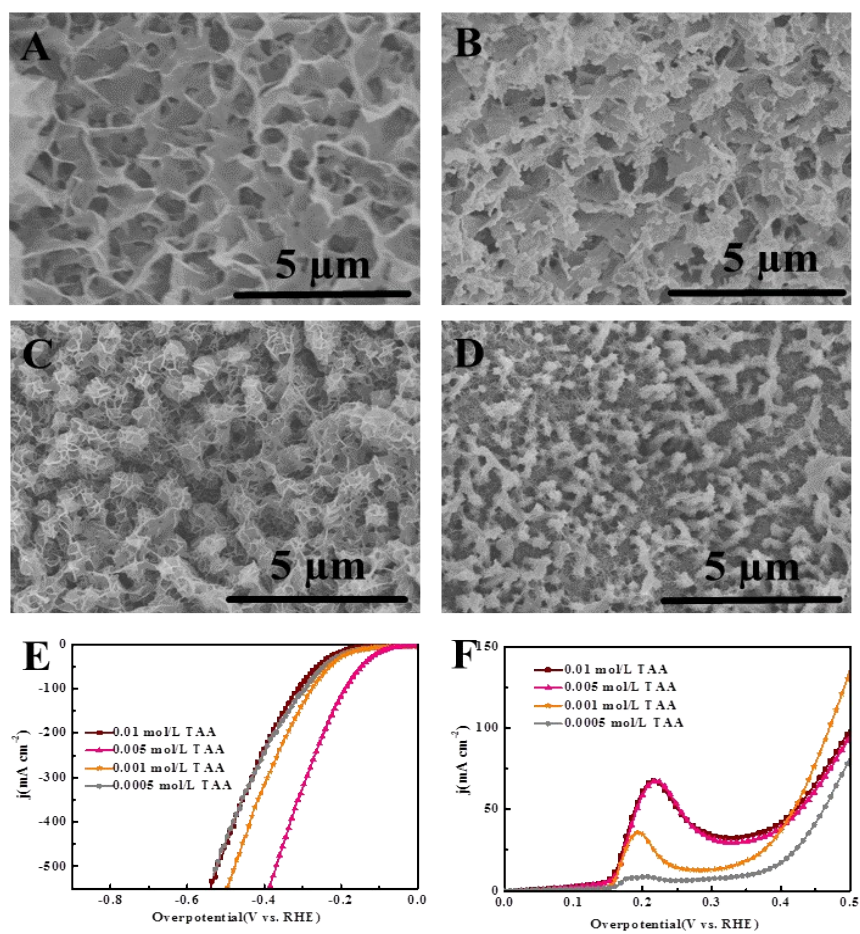

**Figure S.2** SEM images of  $\text{Ni}_3\text{S}_2$  samples grown on foamed nickel with different sulfur source concentrations: (A) 0.0005 mol/L TAA; (B) 0.001 mol/L TAA; (C) 0.005 mol/L TAA ; (D) 0.01 mol/L TAA; Polarization curves of hydrogen evolution and oxygen evolution in 1 M KOH: (E) HER polarization curves; (F) OER polarization curves.

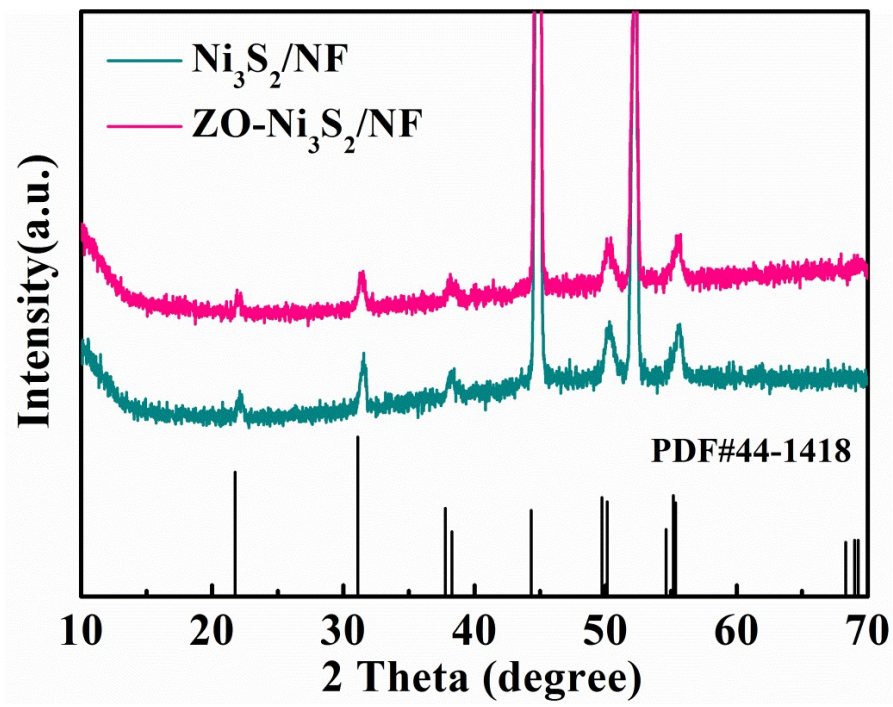

Figure S.3 XRD patterns of  $\text{Ni}_3\text{S}_2/\text{NF}$  and  $\text{ZO-Ni}_3\text{S}_2/\text{NF}$ .

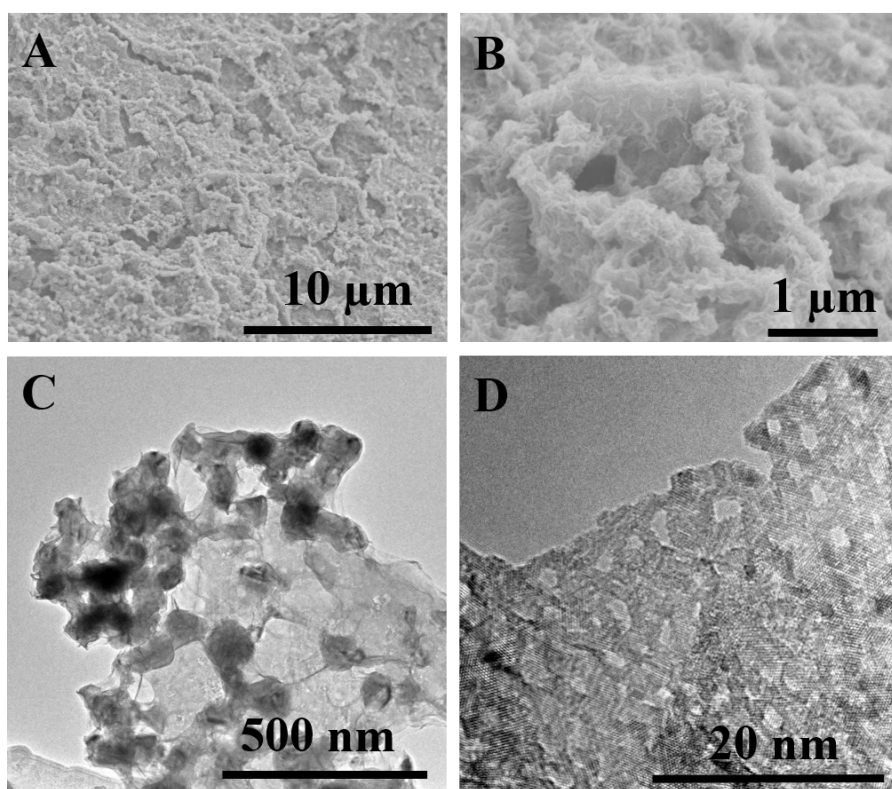

**Figure S.4** (A,B) SEM images; (C) TEM images and (D) High-resolution TEM of  $\text{Ni}_3\text{S}_2/\text{NF}$ .

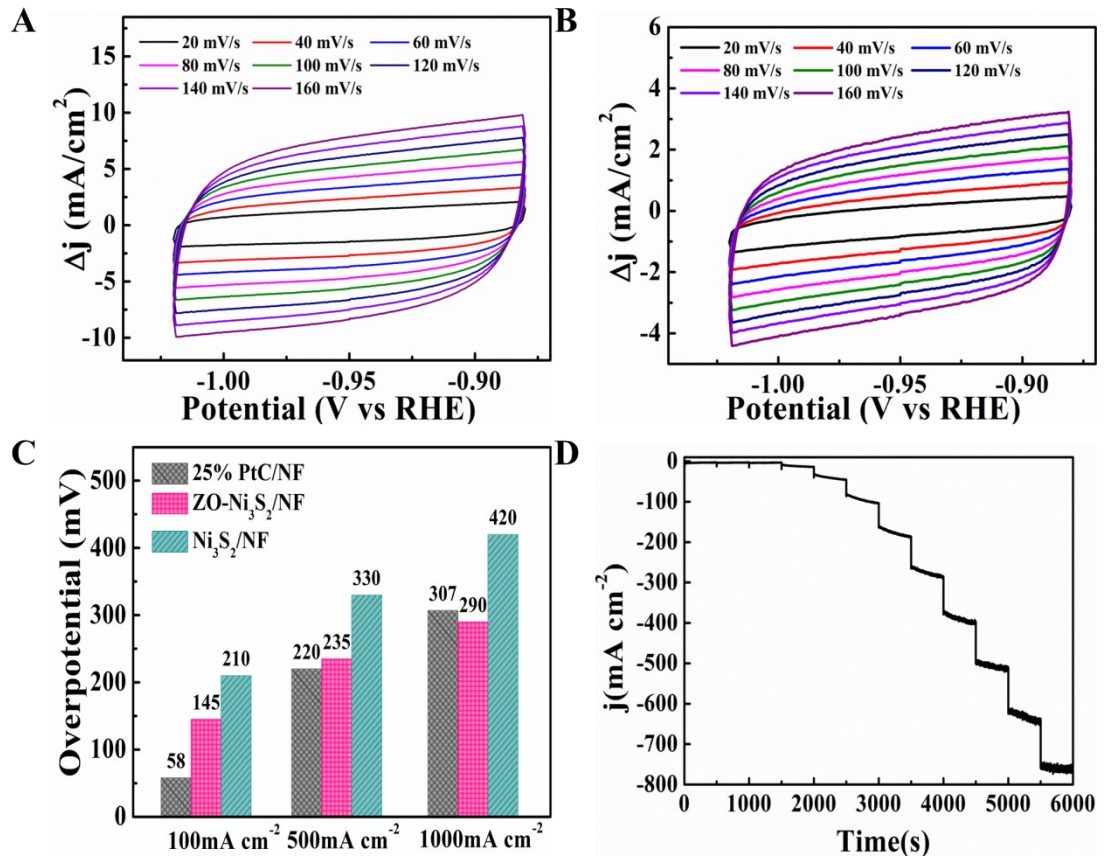

**Figure S.5** Cyclic voltammograms at different speeds at a potential range of -0.88-1.02 V vs. RHE: (A) ZO-Ni<sub>3</sub>S<sub>2</sub>/NF; (B) Ni<sub>3</sub>S<sub>2</sub>/NF; (C) Summary of overpotential at 100, 500, and 1000 mA cm<sup>-2</sup> for ZO-Ni<sub>3</sub>S<sub>2</sub>/NF, Ni<sub>3</sub>S<sub>2</sub>/NF-np and 25% PtC/NF; (D) Multi-step chronoamperometric curves of HER over ZO-Ni<sub>3</sub>S<sub>2</sub>/NF.



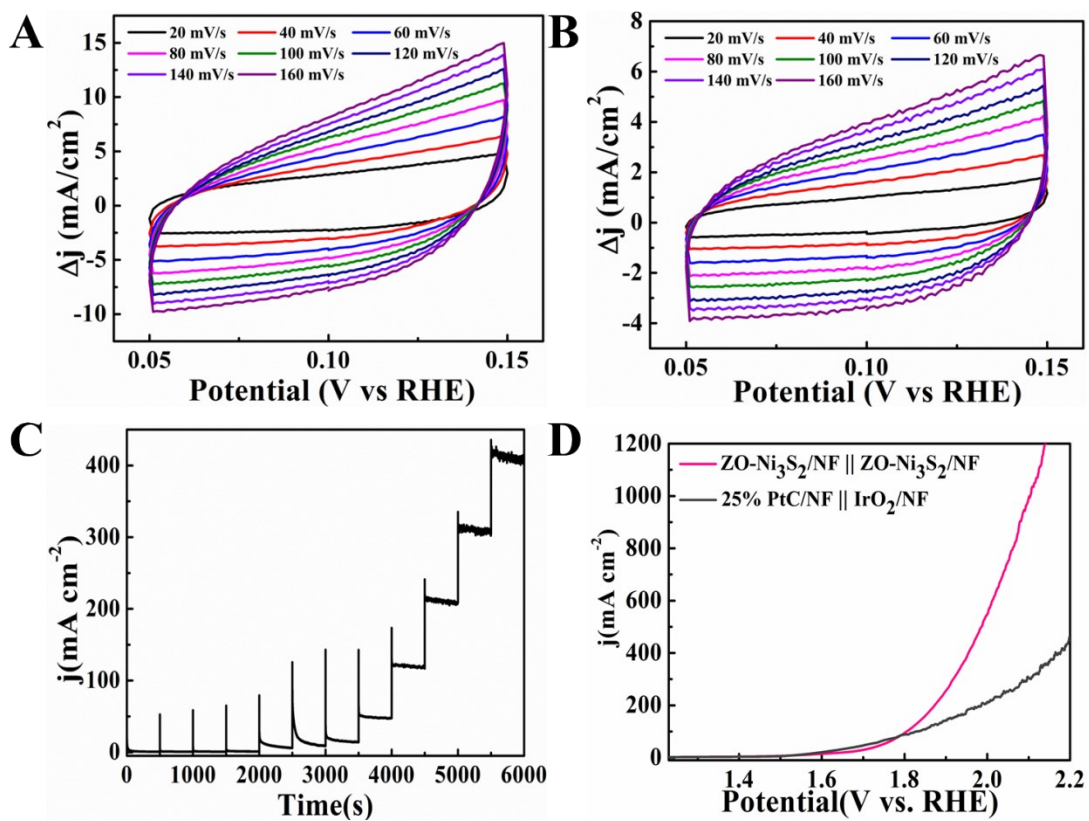

**Figure S.6** Cyclic voltammograms at different speeds at a potential range of 0.05-0.15 V vs. RHE: (A) ZO-Ni<sub>3</sub>S<sub>2</sub>/NF; (B) Ni<sub>3</sub>S<sub>2</sub>/NF; (C) Multi-step chronoamperometric curves of OER over ZO-Ni<sub>3</sub>S<sub>2</sub>/NF; (D) The polarization curve of ZO-Ni<sub>3</sub>S<sub>2</sub>/NF-np for water splitting.

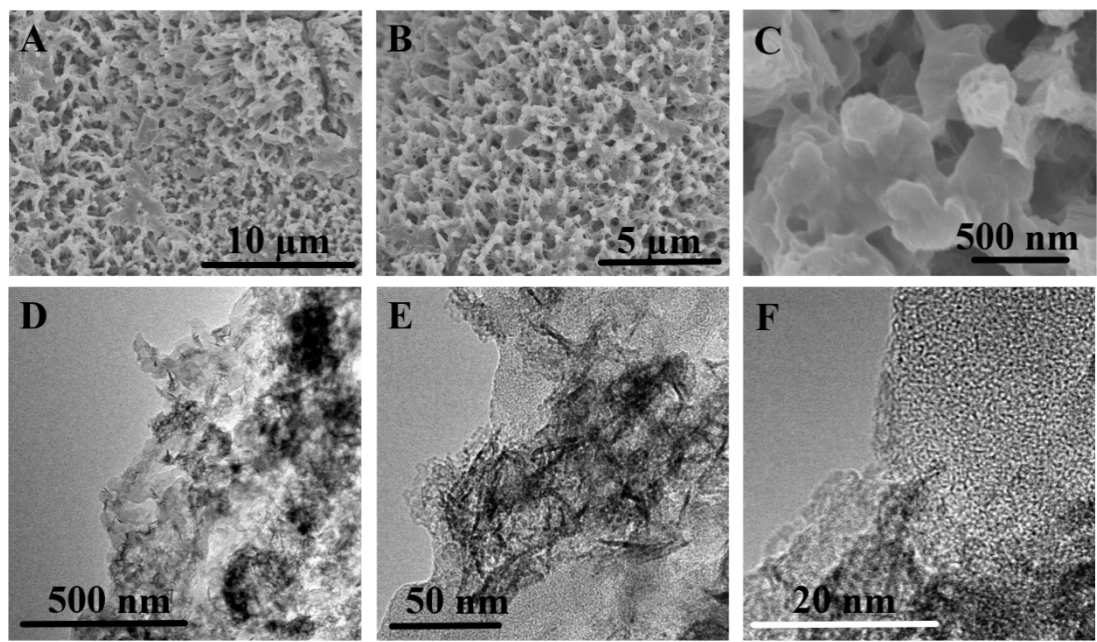

**Figure S.7** SEM images (A-C) and (D-F) TEM images of ZO-Ni<sub>3</sub>S<sub>2</sub>/NF after electrochemical test



**Table S.1** The ICP test data of zinc content in ZO-Ni<sub>3</sub>S<sub>2</sub>/NF.

|                                       | 1                 | 2        | 3        |
|---------------------------------------|-------------------|----------|----------|
| Initial Amount                        | 9.81 mg           |          |          |
| Residual Amount                       | 4.285 mg          | 4.771 mg | 4.468 mg |
|                                       | Average: 4.508 mg |          |          |
| NiZn-LDH/NF                           | 5.302 mg          |          |          |
| Residual Amount                       | 2.4 mg            | 2.1 mg   | 1.95 mg  |
|                                       | Average: 2.15 mg  |          |          |
| ZO-Ni <sub>3</sub> S <sub>2</sub> /NF | 3.152 mg          |          |          |

**Table S.2** Comparison of the HER catalytic performance of ZO-Ni<sub>3</sub>S<sub>2</sub>/NF with other recently reported hydroxide-based electrocatalysts in alkaline solution.

| Catalyst                                                              | Overpotential<br>(mV, at 100<br>mA cm <sup>-2</sup> ) | Overpotential<br>(mV, at 500<br>mA cm <sup>-2</sup> ) | Tafel slope<br>(mV dec <sup>-1</sup> ) | Reference                                                   |
|-----------------------------------------------------------------------|-------------------------------------------------------|-------------------------------------------------------|----------------------------------------|-------------------------------------------------------------|
| ZO-Ni <sub>3</sub> S <sub>2</sub> /NF                                 | 145                                                   | 235                                                   | 102                                    | This work                                                   |
| Cu-Ni <sub>3</sub> S <sub>2</sub> /Co <sub>3</sub> S <sub>4</sub> /NF | 150                                                   | -                                                     | 50.4                                   | Appl. Catal. B Environ.<br>2021, 293, 120225                |
| Ni <sub>2(1-x)</sub> Mo <sub>2x</sub> P                               | 162                                                   | 240                                                   | 46.6                                   | Nano Energy, 2018, 53,<br>492-500                           |
| Ni <sub>3</sub> S <sub>2</sub> @NiV-LDH/NF                            | 256                                                   | ~580                                                  | 69                                     | Nanoscale, 2019, 11,<br>8855-8863                           |
| NiFe <sub>2</sub> O <sub>4</sub> /NiFe LDH                            | -                                                     | 297                                                   | 67.1                                   | ACS Appl. Mater.<br>Interfaces 2018, 10, 31,<br>26283–26292 |
| Ni <sub>3</sub> S <sub>2</sub> @NGCLS/NF                              | 225                                                   | -                                                     | 74                                     | Chem. Eng. J. 2020,<br>401, 126045                          |
| Co-Ni <sub>3</sub> S <sub>2</sub> @CNTs/GNF                           | 350                                                   | -                                                     | 138                                    | J. Mater. Chem. A,<br>2018, 6, 10490-10496                  |
| NiWO <sub>4</sub> /Ni <sub>3</sub> S <sub>2</sub>                     | 274                                                   | -                                                     | 112                                    | Appl. Catal. B Environ.<br>2020, 274, 119120                |
| δ-FeOOH/Ni <sub>3</sub> S <sub>2</sub> /NF                            | 210                                                   | -                                                     | 82.6                                   | J. Mater. Chem. A,<br>2020,8, 21199-21207                   |
| NS-horn/NF                                                            | 350                                                   | -                                                     | 139                                    | Appl. Catal. B Environ.<br>2019, 257, 117911                |
| CoFe-OOH@Co <sub>2</sub> P/NF                                         | ~230                                                  | -                                                     | 76                                     | Electrochimica Acta,<br>2020, 360:136994                    |

**Table S.3** Comparison of the OER catalytic performance of ZO-Ni<sub>3</sub>S<sub>2</sub>/NF with other recently reported hydroxide-based electrocatalysts in alkaline solution.

| <b>catalyst</b>                                      | <b>Overpotential<br/>(mV, at 100<br/>mA cm<sup>-2</sup>)</b> | <b>Overpotential<br/>(mV, at 500<br/>mA cm<sup>-2</sup>)</b> | <b>Tafel<br/>slope<br/>(mV dec-<br/>1)</b> | <b>Reference</b>                                         |
|------------------------------------------------------|--------------------------------------------------------------|--------------------------------------------------------------|--------------------------------------------|----------------------------------------------------------|
| <b>ZO-Ni<sub>3</sub>S<sub>2</sub>/NF</b>             | <b>360</b>                                                   | <b>450</b>                                                   | <b>74.5</b>                                | <b>This work</b>                                         |
| Ni <sub>3</sub> S <sub>2</sub> NTFs                  | 400                                                          | -                                                            | 101.2                                      | Appl. Catal. B: Environ.<br>2019, 243, 693-702           |
| Ni <sub>2(1-x)</sub> Mo <sub>2x</sub> P              | 340                                                          | -                                                            | -                                          | Nano Energy, 2018, 53,<br>492-500                        |
| Ni <sub>3</sub> S <sub>2</sub> @NiV-LDH/NF           | 320                                                          | ~490                                                         | 57                                         | Nanoscale, 2019, 11,<br>8855-8863                        |
| Ni <sub>3</sub> S <sub>2</sub>                       | 400 @ 10 mA<br>cm <sup>-2</sup>                              | -                                                            | 51                                         | ACS Appl. Mater.<br>Interfaces. 2018, 10,<br>12807-12815 |
| Ni <sub>3</sub> S <sub>2</sub> -GQDs/NF              | 394                                                          | -                                                            | 95.5                                       | Small 2017, 13,<br>1700264                               |
| Fe-Ni <sub>3</sub> S <sub>2</sub> /FeNi              | 495                                                          | -                                                            | 54                                         | Small 2017, 13,<br>1604161                               |
| Ni(OH) <sub>2</sub> /Ni <sub>3</sub> S <sub>2</sub>  | 497                                                          | -                                                            | 94.6                                       | J. Mater. Chem. A 2018,<br>6, 6938-6946                  |
| Ni <sub>2</sub> P/Ni <sub>3</sub> S <sub>2</sub> /NF | 330                                                          | -                                                            | 62                                         | Nano Energy,<br>2018, 51, 26-36                          |
| NS-horn/NF                                           | 370                                                          | -                                                            | 120                                        | Appl. Catal. B Environ.<br>2019, 257, 117911             |
| CoFe-OOH@Co <sub>2</sub> P/NF                        | ~220                                                         | -                                                            | 39                                         | Electrochimica Acta,<br>2020, 360:136994                 |

**Table S.4** Comparison of the water splitting performance of ZO-Ni<sub>3</sub>S<sub>2</sub>/NF with other recently reported hydroxide-based electrocatalysts in alkaline solution.

| <b>catalyst</b>                                                       | <b>Water splitting potential (V, at 10 mA cm<sup>-2</sup>)</b> | <b>Water splitting potential (V, at 100 mA cm<sup>-2</sup>)</b> | <b>Reference</b>                                   |
|-----------------------------------------------------------------------|----------------------------------------------------------------|-----------------------------------------------------------------|----------------------------------------------------|
| <b>ZO-Ni<sub>3</sub>S<sub>2</sub>/NF</b>                              | <b>1.548</b>                                                   | <b>1.806</b>                                                    | <b>This work</b>                                   |
| Ni <sub>3</sub> S <sub>2</sub> NTFs                                   | 1.611                                                          | -                                                               | Appl. Catal. B: Environ. 2019, 243, 693-702        |
| Ni <sub>3</sub> S <sub>2</sub>                                        | 2                                                              | -                                                               | ACS Appl. Mater. Interfaces. 2018, 10, 12807-12815 |
| Ni <sub>3</sub> S <sub>2</sub> -GQDs/NF                               | 1.58                                                           | -                                                               | Small 2017, 13, 1700264                            |
| Ni(OH) <sub>2</sub> /Ni <sub>3</sub> S <sub>2</sub>                   | 1.57                                                           | -                                                               | J. Mater. Chem. A 2018, 6, 6938-6946               |
| NS-horn/NF                                                            | 1.57                                                           | ~1.95                                                           | Appl. Catal. B Environ. 2019, 257, 117911          |
| Cu-Ni <sub>3</sub> S <sub>2</sub> /Co <sub>3</sub> S <sub>4</sub> /NF | 1.49                                                           | ~1.85                                                           | Appl. Catal. B: Environ. 2021, 293, 120225         |
| Ni <sub>3</sub> S <sub>2</sub> @NGCLs/NF                              | 1.55                                                           | -                                                               | Chem. Eng. J. 2020, 401, 126045                    |
| δ-FeOOH/Ni <sub>3</sub> S <sub>2</sub> /NF                            | 1.525                                                          | ~1.84                                                           | J. Mater. Chem. A, 2020,8, 21199-21207             |
| CoS <sub>x</sub> /Ni <sub>3</sub> S <sub>2</sub> @NF                  | 1.573                                                          | -                                                               | ACS Appl. Mater. Interfaces, 2018, 10, 27712–27722 |
